# Supplementary material for: Plasma Markers of Alzheimer's Disease Pathology, Neuronal Injury, and Astrocytic Activation and MRI Load of Vascular Pathology and Neurodegeneration: The SMART‐MR Study
Source: PubMed Central journal article supplement — J Am Heart Assoc. 2024 Feb 14;13(4):e032134. doi: 10.1161/JAHA.123.032134 (PMC11010072; doi:10.1161/jaha.123.032134), 2024-02-14
Supplement: JAH3-13-e032134-s001.pdf [file JAH3-13-e032134-s001.pdf]

# **SUPPLEMENTAL MATERIAL**

## **UCC Smart Study Group**

Maarten-Jan Cramer<sup>1</sup>, Hendrik M. Nathoe<sup>1</sup>, Manon G. van der Meer<sup>1</sup>, Gert J. de Borst<sup>2</sup>, Martin Teraa<sup>2</sup>, Michiel L. Bots<sup>3</sup>, Maarten van Smeden<sup>3</sup>, Marielle H. Emmelot-Vonk<sup>4</sup>, Pim A. de Jong<sup>5</sup>, A Titia Lely<sup>6</sup>, Niels P. van der Kaaij<sup>7</sup>, Jaap Kappelle<sup>8</sup>, Ynte M. Ruigrok<sup>8</sup>, Marianne C. Verhaar<sup>9</sup>, Jannick A.N. Dorresteijn<sup>10</sup>, Frank L.J. Visseren<sup>10</sup>

<sup>1</sup>Department of Cardiology, University Medical Center Utrecht, Utrecht, The Netherlands

<sup>2</sup>Department of Vascular Surgery, University Medical Center Utrecht, Utrecht, The Netherlands

<sup>3</sup>Department of Epidemiology, Julius Center for Health Sciences and Primary Care, University Medical Center Utrecht, Utrecht University, The Netherlands

<sup>4</sup>Department of Geriatrics, University Medical Center Utrecht, Utrecht, The Netherlands

<sup>5</sup>Department of Radiology, University Medical Center Utrecht, Utrecht, The Netherlands

<sup>6</sup>Department of Obstetrics, Birth Centre Wilhelmina Children's Hospital, University Medical Center Utrecht, Division Women and Baby, Utrecht University, Utrecht, The Netherlands

<sup>7</sup>Department of Cardiothoracic Surgery, University Medical Center Utrecht, Utrecht, The Netherlands

<sup>8</sup>Department of Neurology, University Medical Center Utrecht, Utrecht, The Netherlands

<sup>9</sup>Department of Nephrology and Hypertension and Regenerative Medicine Centre Utrecht, University Medical Centre Utrecht, Utrecht, The Netherlands

<sup>10</sup>Department of Vascular Medicine, Utrecht University, Utrecht, Utrecht, The Netherlands

## **NCDC Consortium**

Pieter Jelle Visser<sup>1,2</sup>, Almar A.L. Kok<sup>3</sup>, Martijn Huisman<sup>4</sup>, M. Arfan Ikram<sup>5</sup>, Frank J. Wolters<sup>5,6</sup>, Edo Richard<sup>7,8</sup>, Eric P. Moll van Charante<sup>8,9</sup>, Miranda T. Schram<sup>10,11,12,13</sup>, Thomas T. van Sloten<sup>14</sup>, W.M. Monique Verschuren<sup>15,16</sup>, Astrid C.J. Nooyens<sup>16</sup>, Peter P. de Deyn<sup>17</sup>, Wiesje M. van der Flier<sup>2,4</sup>, P. Eline Slagboom<sup>18</sup>, Marian Beekman<sup>18</sup>, Mirjam I. Geerlings<sup>9,15</sup>

<sup>1</sup>Department of Psychiatry and Neuropsychology, School for Mental Health and Neuroscience (MHeNS), Maastricht University, Maastricht, The Netherlands

<sup>2</sup>Alzheimer Center, Department of Neurology, Neuroscience Campus Amsterdam, VU University Medical Centre, Amsterdam, The Netherlands

<sup>3</sup>Department of Psychiatry, Amsterdam Public Health, Amsterdam University Medical Center, Vrije Universiteit, Amsterdam, The Netherlands

<sup>4</sup>Department of Epidemiology and Biostatistics, Amsterdam UMC Location VUmc, Amsterdam Public Health Research Institute, Amsterdam, The Netherlands

<sup>5</sup>Department of Epidemiology, Erasmus University Medical Center, Rotterdam, The Netherlands

<sup>6</sup>Department of Neurology, Erasmus University Medical Center, Rotterdam, The Netherlands

<sup>7</sup>Department of Neurology, Donders Institute for Brain, Cognition and Behaviour, Radboud University Medical Centre, Nijmegen, The Netherlands

<sup>8</sup>Department of Public and Occupational Health, Amsterdam UMC, University of Amsterdam, Amsterdam, The Netherlands

<sup>9</sup>Department of General Practice, Amsterdam UMC, University of Amsterdam, Amsterdam, The Netherlands

<sup>10</sup>Department of Internal Medicine, Maastricht University Medical Centre, Maastricht, The Netherlands

<sup>11</sup>School for Cardiovascular Diseases CARIM, Maastricht University, Maastricht, The Netherlands

<sup>12</sup>School for Mental Health and Neuroscience MHENS, Maastricht University, Maastricht, The Netherlands

<sup>13</sup>Department of Psychiatry and Neuropsychology, Maastricht University Medical Centre, Maastricht, The Netherlands

<sup>14</sup>Vascular Medicine and Endocrinology, UMC Utrecht, Utrecht, The Netherlands

<sup>15</sup>Julius Center for Health Sciences and Primary Care, University Medical Center Utrecht, Utrecht University, The Netherlands

<sup>16</sup>Center for Nutrition, Prevention and Health Services, National Institute for Public Health and the Environment, The Netherlands

<sup>17</sup>Laboratory of Neurochemistry and Behavior, Faculty of Pharmaceutical, Biomedical and Veterinary Sciences, Faculty of Medicine and Health Sciences, University of Antwerp, Antwerp, Belgium

<sup>18</sup>Department of Molecular Epidemiology, Leiden University Medical Center, The Netherlands

**Table S1. Prevalence of arterial diseases in the study sample.**

|                             | N (%)     |
|-----------------------------|-----------|
| Cerebrovascular disease     | 192 (26%) |
| Coronary artery disease     | 489 (65%) |
| Peripheral arterial disease | 151 (20%) |
| Abdominal aortic aneurysm   | 49 (7%)   |

**Table S2. Associations between A $\beta$ 40 and A $\beta$ 42 and MRI markers of CSVD.**

| Plasma levels<br>(per SD<br>increase) | White matter hyperintensity<br>volume, B (95% CI), p-value | Total brain volume, B (95% CI),<br>p-value | Hippocampal volume, B (95% CI),<br>p-value          |
|---------------------------------------|------------------------------------------------------------|--------------------------------------------|-----------------------------------------------------|
| <i>Model 1</i>                        |                                                            |                                            |                                                     |
| A $\beta$ 40                          | 0.12 (0.02; 0.022), $p = 0.018$                            | -1.88 (-4.71; 0.96), $p = 0.194$           | <b>-0.11 (-0.17; -0.05), <math>p = 0.001</math></b> |
| A $\beta$ 42                          | 0.09 (-0.01; 0.18), $p = 0.071$                            | -3.61 (-6.26; -0.96), $p = 0.008$          | -0.06 (-0.12; 0.00), $p = 0.051$                    |
| A $\beta$ 42/A $\beta$ 40*            | -0.06 (-0.16; 0.03), $p = 0.194$                           | -0.45 (-3.16; 2.27), $p = 0.747$           | 0.03 (-0.03; 0.09), $p = 0.271$                     |
| <i>Model 2</i>                        |                                                            |                                            |                                                     |
| A $\beta$ 40                          | 0.12 (0.01; 0.22), $p = 0.025$                             | -1.49 (-4.31; 1.33), $p = 0.300$           | <b>-0.11 (-0.18; -0.05), <math>p = 0.001</math></b> |
| A $\beta$ 42                          | 0.08 (-0.02; 0.17), $p = 0.102$                            | -3.46 (-6.08; -0.83), $p = 0.010$          | -0.06 (-0.12; 0.00), $p = 0.048$                    |
| A $\beta$ 42/A $\beta$ 40*            | -0.07 (-0.17; 0.02), $p = 0.144$                           | -0.36 (-3.01; 2.29), $p = 0.791$           | 0.03 (-0.03; 0.09), $p = 0.310$                     |

Model 1 is adjusted for age, sex, education, and intracranial volume. Model 2 adds diabetes mellitus, hypertension, smoking status, and alcohol use. White matter lesion volume is log-transformed. \* = including 1/A $\beta$ 40 and A $\beta$ 42 as main effects in the model. SD = standard deviation, A $\beta$  = amyloid-beta, CI = confidence interval.

**Table S3. Associations between A $\beta$ 40 and A $\beta$ 42 and infarcts.**

| Plasma levels<br>(per SD<br>increase) | Number of infarcts,<br>OR (95% CI), p-value | Lacunar infarcts,<br>OR (95% CI), p-value | Cortical infarcts,<br>OR (95% CI), p-value |
|---------------------------------------|---------------------------------------------|-------------------------------------------|--------------------------------------------|
| <i>Model 1</i>                        |                                             |                                           |                                            |
| A $\beta$ 40                          | 1.00 (0.83; 1.20), <i>p</i> = 0.958         | 0.93 (0.76; 1.14), <i>p</i> = 0.492       | 1.16 (0.91; 1.47), <i>p</i> = 0.228        |
| A $\beta$ 42                          | 1.05 (0.88; 1.25), <i>p</i> = 0.620         | 1.05 (0.87; 1.28), <i>p</i> = 0.602       | 1.23 (0.98; 1.54), <i>p</i> = 0.080        |
| A $\beta$ 42/A $\beta$ 40*            | 1.18 (0.84; 1.67), <i>p</i> = 0.344         | 1.32 (0.80; 2.20), <i>p</i> = 0.279       | 0.99 (0.77; 1.26), <i>p</i> = 0.909        |
| <i>Model 2</i>                        |                                             |                                           |                                            |
| A $\beta$ 40                          | 0.96 (0.79; 1.16), <i>p</i> = 0.644         | 0.87 (0.70; 1.07), <i>p</i> = 0.185       | 1.12 (0.88; 1.44), <i>p</i> = 0.356        |
| A $\beta$ 42                          | 1.01 (0.84; 1.21), <i>p</i> = 0.933         | 0.99 (0.81; 1.21), <i>p</i> = 0.896       | 1.21 (0.95; 1.53), <i>p</i> = 0.126        |
| A $\beta$ 42/A $\beta$ 40*            | 1.20 (0.79; 1.83), <i>p</i> = 0.384         | 1.39 (0.80; 2.41), <i>p</i> = 0.242       | 0.97 (0.77; 1.23), <i>p</i> = 0.814        |

Model 1 is adjusted for age, sex, and education. Model 2 adds diabetes mellitus, hypertension, smoking status, and alcohol use. White matter lesion volume is log-transformed. \* = including 1/A $\beta$ 40 and A $\beta$ 42 as main effects in the model. SD = standard deviation, A $\beta$  = amyloid-beta, OR = odds ratio, CI = confidence interval.

Figure S1. Correlation matrix between age, AD plasma markers, and MRI markers of vascular pathology.

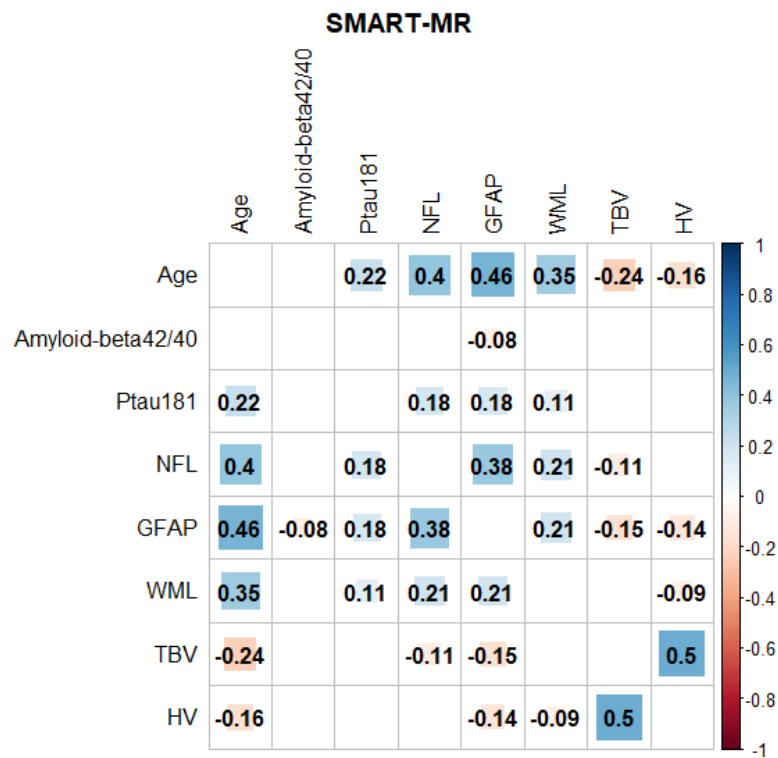

Pearson correlation coefficients are shown. Bolded coefficients are significant at  $p < 0.05$ . NFL = neurofilament light, GFAP = glial fibrillary acidic protein, WML = white matter lesions, TBV = total brain volume, HV = hippocampal volume.
